# Supplementary material for: Ab initio study on SN2 reaction of methyl p-nitrobenzenesulfonate and chloride anion in [mmim][PF6]
Source: Royal Society of Chemistry journal article supplement (doi:10.1039/b920190b), 2010-01-01
Supplement: b920190b.pdf [file b920190b.pdf]

# Electronic Supplementary Information for “Ab initio study of a S<sub>N</sub>2 reaction of methyl *p*-nitrobenzenesulfonate and chloride anion in [mmim][PF<sub>6</sub>]”

November 17, 2009

The Electronic Supplementary Information includes the following data;

- (1) Cartesian coordinate of the reactant, TS, and product.
- (2) Potential energy obtained by RHF and CCSD level calculations.
- (3) Selected bond lengths and the reaction coordinate in the optimized structures in gas phase and in solutions.
- (4) Activation free energy evaluated with the solvation free energy in different forms.

Table 1: Cartesian coordinate of methyl *p*-nitrobenzenesulfonate (*p*-NBS). All units are in angstrom.

| atom | X             | Y             | Z             |
|------|---------------|---------------|---------------|
| C    | 0.1950865680  | -0.4170522423 | 0.0000000000  |
| C    | 0.1454978158  | 0.2535234917  | -1.2115320612 |
| C    | 0.1454978158  | 0.2535234917  | 1.2115320612  |
| C    | 0.0323553797  | 1.6334247530  | -1.2141722194 |
| C    | 0.0323553797  | 1.6334247530  | 1.2141722194  |
| C    | -0.0250240392 | 2.2927104509  | 0.0000000000  |
| H    | 0.2060351678  | -0.2899308168 | -2.1344545114 |
| H    | 0.2060351678  | -0.2899308168 | 2.1344545114  |
| H    | -0.0064967765 | 2.1842189842  | -2.1318565342 |
| H    | -0.0064967765 | 2.1842189842  | 2.1318565342  |
| N    | -0.1450757996 | 3.7540337619  | 0.0000000000  |
| O    | -0.1908678355 | 4.3018120204  | -1.0585717143 |
| O    | -0.1908678355 | 4.3018120204  | 1.0585717143  |
| S    | 0.3307975055  | -2.1794892178 | 0.0000000000  |
| O    | 0.9032421189  | -2.6121439636 | -1.2316188087 |
| O    | 0.9032421189  | -2.6121439636 | 1.2316188087  |
| O    | -1.2005474280 | -2.5362105490 | 0.0000000000  |
| C    | -1.5670840237 | -3.9253578174 | 0.0000000000  |
| H    | -2.6440188696 | -3.9271892134 | 0.0000000000  |
| H    | -1.1866363269 | -4.4033235553 | -0.8902971989 |
| H    | -1.1866363269 | -4.4033235553 | 0.8902971989  |

Table 2: Cartesian coordinate of TS. All units are in angstrom.

| atom | X             | Y             | Z             |
|------|---------------|---------------|---------------|
| C    | 0.1982525034  | -0.6838693987 | 0.0000000000  |
| C    | 0.1141742484  | -0.0043307690 | -1.2060626339 |
| C    | 0.1141742484  | -0.0043307690 | 1.2060626339  |
| C    | -0.0618310195 | 1.3685097782  | -1.2123604817 |
| C    | -0.0618310195 | 1.3685097782  | 1.2123604817  |
| C    | -0.1487983593 | 2.0310300609  | 0.0000000000  |
| H    | 0.1980556350  | -0.5470367424 | -2.1276277038 |
| H    | 0.1980556350  | -0.5470367424 | 2.1276277038  |
| H    | -0.1272520570 | 1.9137829625  | -2.1321107840 |
| H    | -0.1272520570 | 1.9137829625  | 2.1321107840  |
| N    | -0.3310233285 | 3.4798728631  | 0.0000000000  |
| O    | -0.4009481418 | 4.0353120698  | -1.0567869452 |
| O    | -0.4009481418 | 4.0353120698  | 1.0567869452  |
| S    | 0.3869468794  | -2.4618768519 | 0.0000000000  |
| O    | 1.0631693660  | -2.7952113355 | -1.2259805237 |
| O    | 1.0631693660  | -2.7952113355 | 1.2259805237  |
| O    | -1.0308212693 | -2.9164576124 | 0.0000000000  |
| C    | -1.5688057250 | -4.7389826154 | 0.0000000000  |
| H    | -2.5851033603 | -4.4322266348 | 0.0000000000  |
| H    | -1.0952004021 | -4.9847761306 | -0.9199992683 |
| H    | -1.0952004021 | -4.9847761306 | 0.9199992683  |
| Cl   | -2.4842189599 | -7.0614491850 | 0.0000000000  |

Table 3: Cartesian coordinate of *p*-NBS anion. All units are in angstrom.

| atom | X             | Y             | Z             |
|------|---------------|---------------|---------------|
| C    | 0.2110280581  | -0.7024692012 | 0.0000000000  |
| C    | 0.1201654099  | -0.0137270348 | -1.2030935878 |
| C    | 0.1201654099  | -0.0137270348 | 1.2030935878  |
| C    | -0.0713771767 | 1.3562273597  | -1.2114853574 |
| C    | -0.0713771767 | 1.3562273597  | 1.2114853574  |
| C    | -0.1683500251 | 2.0224462803  | 0.0000000000  |
| H    | 0.2114131234  | -0.5560477466 | -2.1243204846 |
| H    | 0.2114131234  | -0.5560477466 | 2.1243204846  |
| H    | -0.1423506660 | 1.8994956159  | -2.1323961708 |
| H    | -0.1423506660 | 1.8994956159  | 2.1323961708  |
| N    | -0.3714939961 | 3.4635905355  | 0.0000000000  |
| O    | -0.4509757590 | 4.0237014167  | -1.0560279812 |
| O    | -0.4509757590 | 4.0237014167  | 1.0560279812  |
| S    | 0.3870760080  | -2.4981128104 | 0.0000000000  |
| O    | 1.1157125497  | -2.7789715940 | -1.2211798349 |
| O    | 1.1157125497  | -2.7789715940 | 1.2211798349  |
| O    | -0.9832540660 | -2.9717405409 | 0.0000000000  |

Table 4: Cartesian coordinate of methyl chloride. All units are in angstrom.

| atom | X             | Y             | Z             |
|------|---------------|---------------|---------------|
| Cl   | 0.0000000000  | 0.0000000000  | -0.3113498333 |
| C    | 0.0000000000  | 0.0000000000  | -2.0971904468 |
| H    | -0.5113291425 | 0.8856480543  | -2.4377142400 |
| H    | -0.5113291425 | -0.8856480543 | -2.4377142400 |
| H    | 1.0226582851  | 0.0000000000  | -2.4377142400 |

Table 5: Potential energy obtained by RHF and CCSD level calculations.

|          | species             | $E(\text{RHF}) / \text{a.u.}$ | $E(\text{CCSD}) / \text{a.u.}$ |
|----------|---------------------|-------------------------------|--------------------------------|
| reactant | <i>p</i> -NBS       | -1095.2345799032              | -1097.3769562663               |
|          | chloride anion      | -459.5396608917               | -459.6834655691                |
| TS       |                     | -1554.7802741306              | -1557.0787006984               |
| product  | <i>p</i> -NBS anion | -1055.7152053475              | -1057.7267722172               |
|          | methyl chloride     | -499.0941581388               | -499.3856986061                |

Table 6: Selected bond lengths and the reaction coordinate in the optimized structures in gas phase and in solutions. All units are in angstrom.

| <i>R</i> | comment                                                  | $r(\text{O}_{\text{S}1}-\text{CH}_3)$ | $r(\text{CH}_3-\text{Cl})$ | relative energy <sup>a</sup> / kcal mol <sup>-1</sup> |
|----------|----------------------------------------------------------|---------------------------------------|----------------------------|-------------------------------------------------------|
| -0.596   | optimized TS in gas                                      | 1.900                                 | 2.496                      | 0.00                                                  |
| -0.469   | optimized TS in DCM                                      | 1.949                                 | 2.418                      | 0.00                                                  |
| -0.5     | approximated TS in DCM <sup>b</sup>                      | 1.955                                 | 2.455                      | 0.18                                                  |
| -0.412   | optimized TS in [mmim][PF <sub>6</sub> ]                 | 2.003                                 | 2.415                      | 0.00                                                  |
| -0.4     | approximated TS in [mmim][PF <sub>6</sub> ] <sup>b</sup> | 2.005                                 | 2.405                      | 0.58                                                  |

<sup>a</sup> The energy difference between the optimized and approximated TSs. <sup>b</sup> The highest energy point in each solvent evaluated from the gas phase optimized structures.

Table 7: Activation free energy evaluated with the different free energy formulae. The values were computed based on the coupling with RHF level. All units are in kcal mol<sup>-1</sup>.

| free energy form          | $\Delta\mathcal{A}^\ddagger$ ([mmim][PF <sub>6</sub> ]) | $\Delta\mathcal{A}^\ddagger$ (DCM) | difference |
|---------------------------|---------------------------------------------------------|------------------------------------|------------|
| KH (Kovalenko-Hirata)     | 22.52                                                   | 12.59                              | 9.93       |
| HNC (hyper-netted chain)  | 24.26                                                   | 13.98                              | 10.28      |
| GF (Gaussian Fluctuation) | 27.40                                                   | 19.74                              | 7.66       |
